# Supplementary material for: Phytaspase Is Capable of Detaching the Endoplasmic Reticulum Retrieval Signal from Tobacco Calreticulin-3
Source: MDPI journal article supplement (doi:10.3390/ijms242216527), 2023-11-20
Supplement: s1 [file s1]

**Figure S1.** Mass spectra of Lys-C peptides originated from (a) non-treated and (b) *NtPhyt*-treated CRT3 bands (arrows in Figure 1A); (c) non-treated and (d) *NtPhyt*-treated CRT3 D420E bands (lanes 3 and 4 in Figure 2A). Positions of the characteristic C-terminal semi-LysC peptides and of the N-terminal peptides are marked in red.

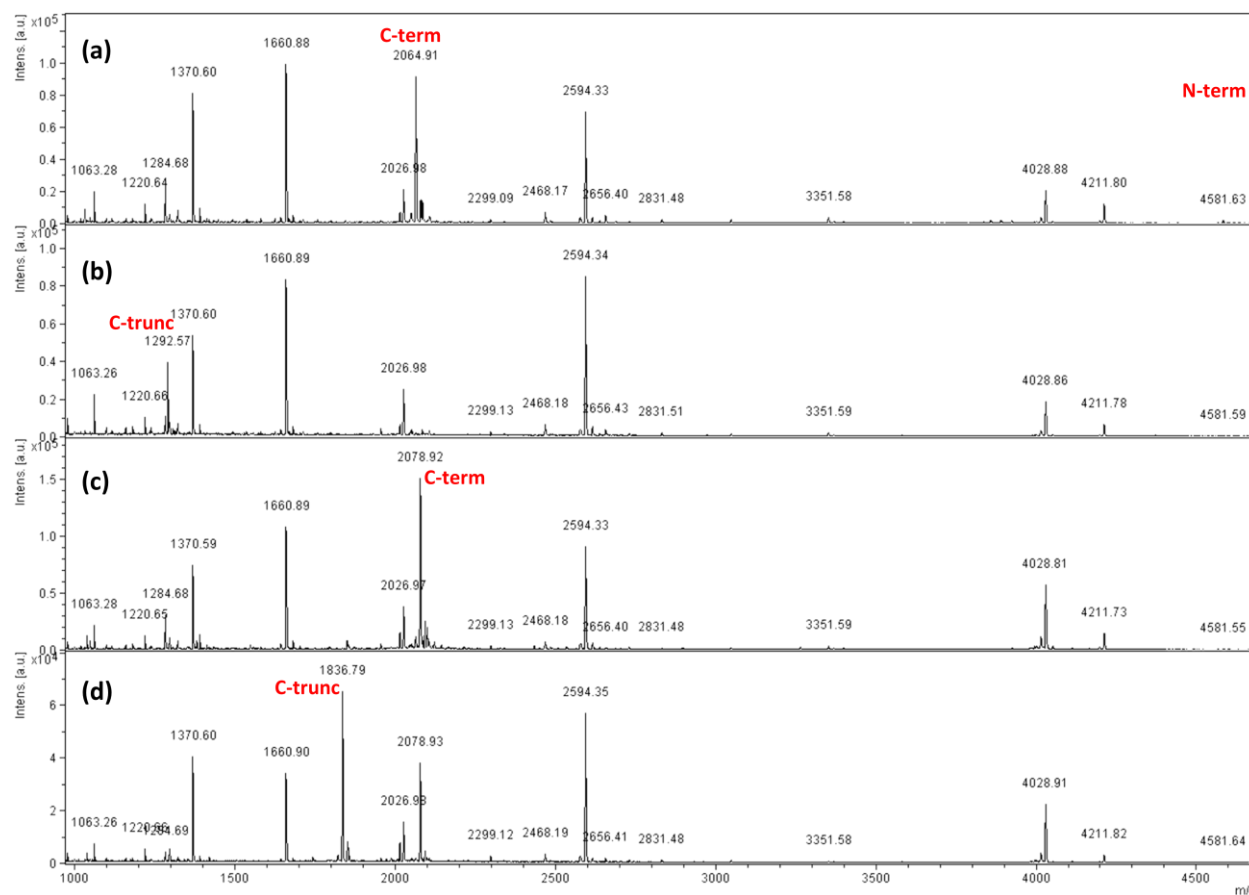

**Figure S2.** MS/MS fragmentation spectra of the characteristic C-terminal semi-LysC peptides of CRT3 ((a) non-treated, (b) *N*-Phyt-treated) and CRT3 D420E mutant ((c) non-treated, (d) *N*-Phyt-treated) marked in Figure S1.

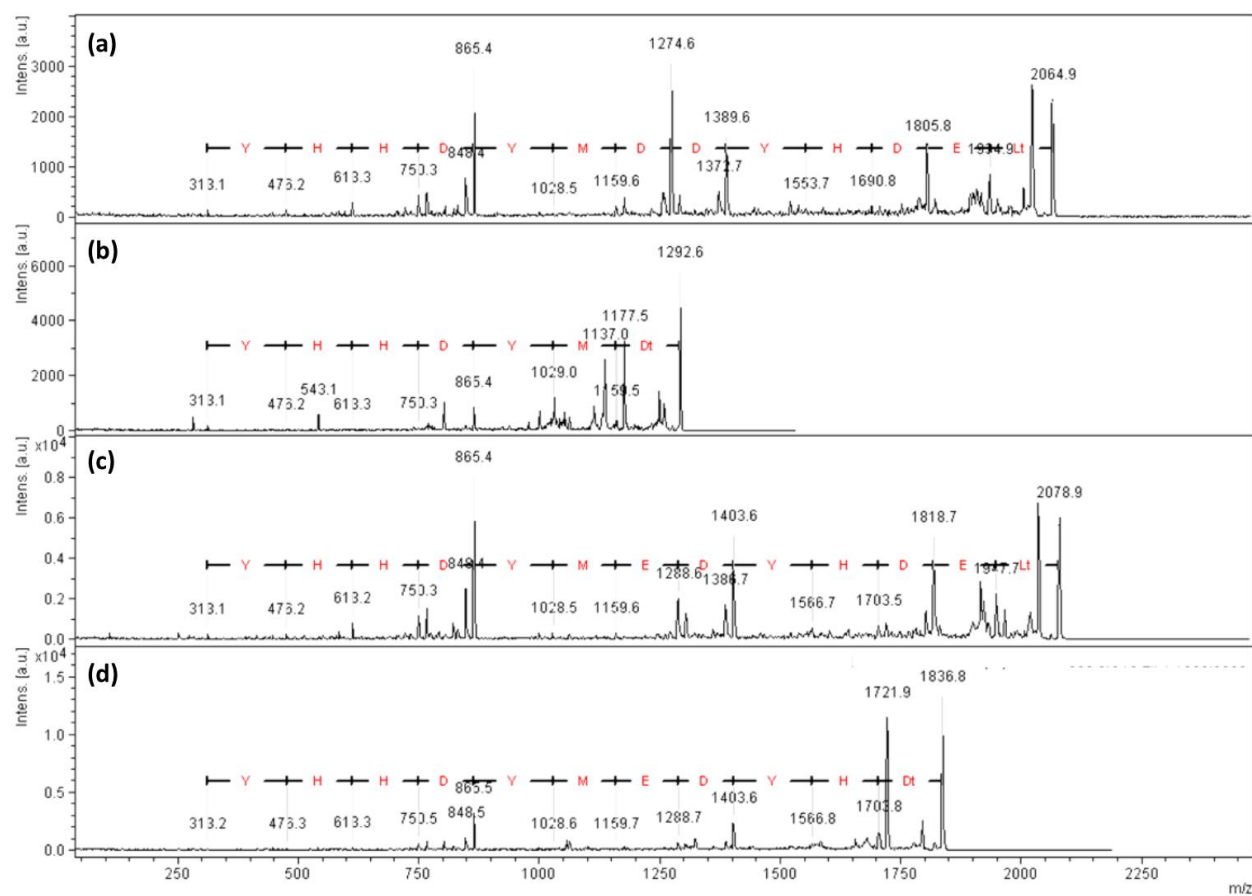

**Table S1.** List of the primers used in this study.

| #  | Primer name        | Sequence                                             |
|----|--------------------|------------------------------------------------------|
| 1  | CRT3_Pst700_dir    | AAGCCTGCAGACTGGGAAGAC                                |
| 2  | CRT3_D420E_Sac_rev | CGGAGCTCTTAAAGTTCATCATGGTAGTCTTCCATATAATC            |
| 3  | CRT_Kpn_Nco_dir    | CAAGGTACCATGGCTCTCTCTGAGCATAAAC                      |
| 4  | CRT_SP_Sal_rev     | GTGGTCGACGAAAATCTCAGATGCTGAAG                        |
| 5  | CRT_LF_Apa_Nde_dir | GAGGGCCCGCATCTCATATGTCTGAGATTTTCTTTGAAGAAAG          |
| 6  | CRT_1-420_Sac_rev  | CGGAGCTCTTAATCCATATAATCGTGGTGATAGC                   |
| 7  | EGFP_Sal_dir       | GAGGTCGACAAATCTGAGATGGTGAGCAAGGGCGAG                 |
| 8  | EGFP_Apa_rev       | GTGGGCCCGACCTGGAGACTTGTACAGCTCGTCCATGC               |
| 9  | pLH_seq_dir        | GACCTCGAGAATTCTCAAC                                  |
| 10 | NtPhyt-His_rev     | GGGAGCTCTTAATGGTGATGATGATGGTGCAGAGGATCCAC<br>TCCTATG |
